# Supplementary material
Source: publisher site journal article supplement (https://www.spandidos-publications.com/4117/downloadSupplementary)

Figure S1. Histogram plot of absorbance values obtained with MTT assay for each cell lines controls (T24 and 5637). Black column: untreated cells in fresh medium, RPMI-1640 +10% FBS without DMSO used to resuspend violacein; grey column: untreated cells in fresh medium, RPMI-1640 +10% FBS with DMSO, used to resuspend violacein (0.1% v/v). No significant changes were observed. The assays were carried out in triplicate.

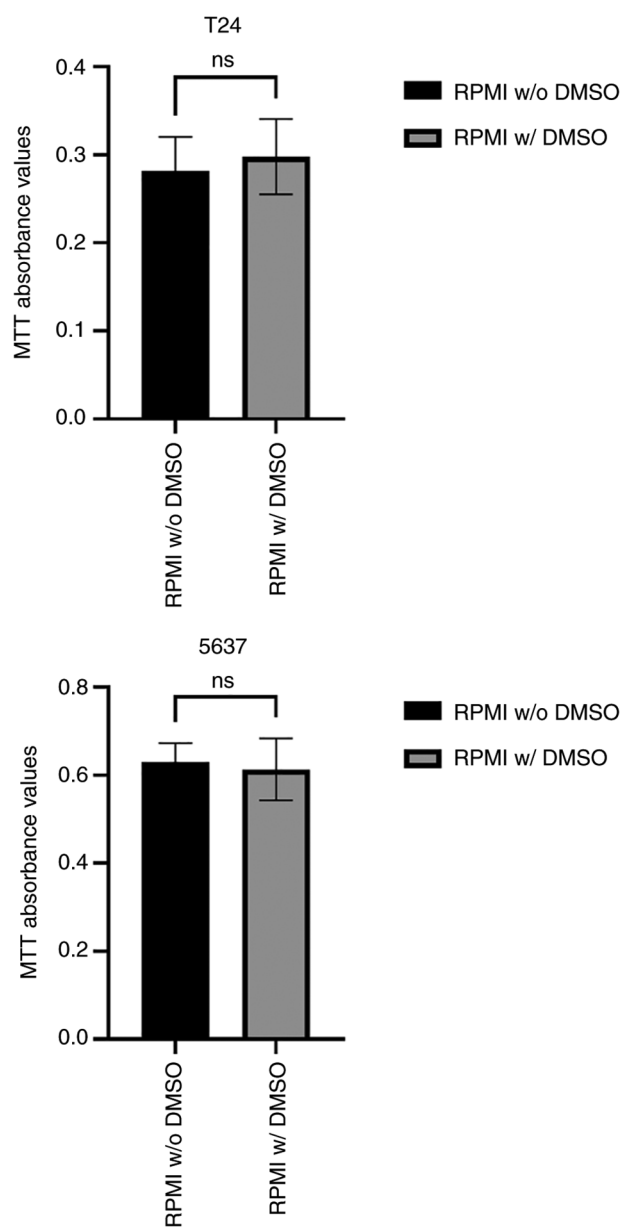

Figure S2. Histogram plot of absorbance values obtained with MTT assay for the cell lines T24 and 5637. The assay has been performed directly after treatment with different violacein concentrations: 0.1, 0.2, 0.3, 0.5, and 1  $\mu$ M before (Pre) and after (Post) restoration of fresh medium for 48 h. No significant changes were observed. The assays were carried out in triplicate.

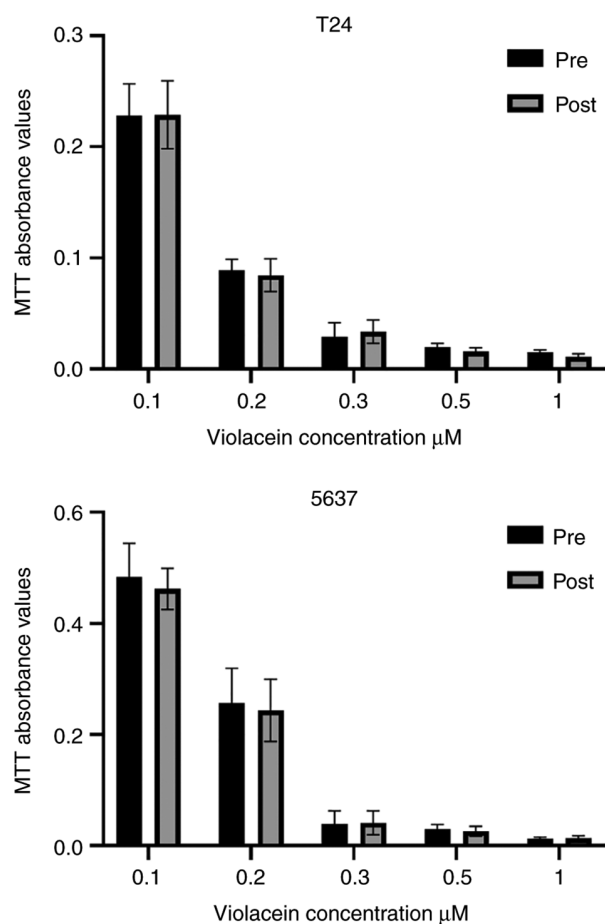

Figure S3. Histogram plot for each cell line, relative to the median of the fluorescence intensity values of cells based on caspase-3 activation (MFI Casp-3), after 1  $\mu$ M violacein treatment for 1, 3 or 24 h compared with the respective untreated cells, resuspended in fresh medium added with DMSO. The data are presented as mean  $\pm$  SD. In both cell lines, the maximum expression of active caspase-3 was obtained after 3 h of treatment, no significant changes were observed at 1 or 24 h of treatment with violacein compared to untreated cells; \*\*\*P<0.001. The assays were carried out in triplicate.

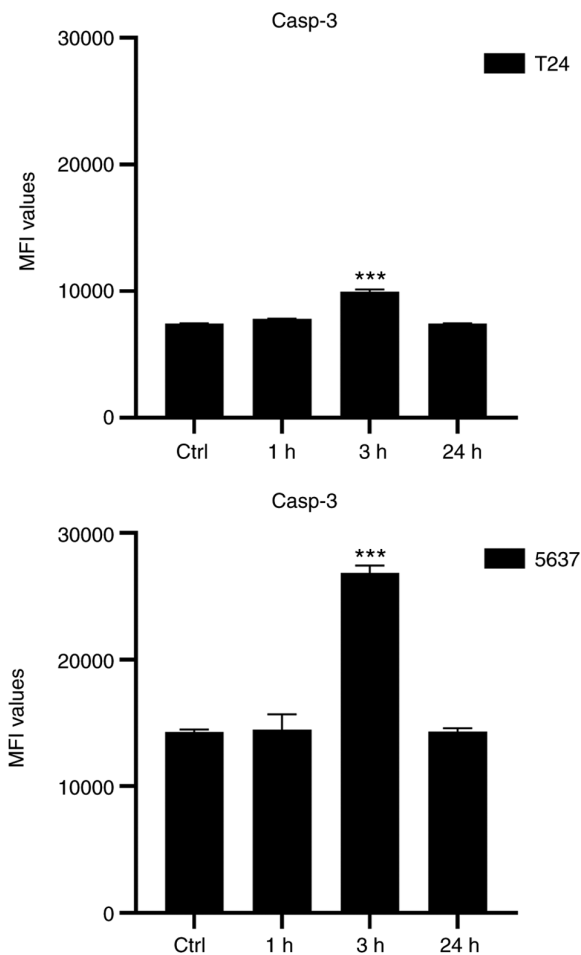

Supplement: Supplementary file 1 [file downloadSupplementary]
